# Supplementary material
Source: HighWire-hosted journal article supplement (https://www.cmajopen.ca/highwire/filestream/90562/field_highwire_adjunct_files/1/open-2022-0158-original-submission.pdf)
Supplement: open-2022-0158-original-submission.pdf [file open-2022-0158-original-submission.pdf]

## Post-Pandemic Recovery in Psychiatric Services:

### A Crosssectional Comparison of Inpatient Admissions and Acuity across Three Time Periods

Elke Ham,<sup>1</sup> N. Zoe Hilton,<sup>1,2</sup> Jennifer Crawford,<sup>1,3</sup> and Soyeon Kim<sup>1,4</sup>

<sup>1</sup> Waypoint Research Institute, Waypoint Centre for Mental Health Care, Penetanguishene, ON

<sup>2</sup> Department of Psychiatry, Temerty Faculty of Medicine, University of Toronto, Toronto, ON

<sup>3</sup> Faculty of Health Sciences, Ontario Tech University, Oshawa, ON

<sup>4</sup> Psychiatry and Behavioural Neurosciences, McMaster University, Hamilton, ON, Canada

#### Author Note

Elke Ham, OCGC  <https://orcid.org/0000-0001-7368-3090>

N. Zoe Hilton, PhD, CPsych  <https://orcid.org/0000-0002-7961-0615>

Jennifer Crawford, PhD  <https://orcid.org/0000-0001-7133-0566>

Soyeon Kim, PhD  <https://orcid.org/0000-0002-9102-5814>

We have no known conflict of interest to disclose. This study did not involve external funding sources. Data on which this study is based was extracted from the Ontario Mental Health Reporting System (OMHRS). Similar data is available through the Canadian Institute for Health Information to researchers, decision-makers and health managers at <https://www.cihi.ca/en/data-inquiry-form>

Correspondence concerning this article should be addressed to Elke Ham, Waypoint Research Institute, Waypoint Centre for Mental Health Care, 500 Church Street, Penetanguishene, ON, L9M 1G3, Canada. Email: [eham@waypointcentre.ca](mailto:eham@waypointcentre.ca)

### Abstract

**Background.** Directives to restrict movement during the COVID-19 pandemic were related to increased mental health problems in the population, yet admissions to psychiatric hospitals and emergency departments decreased. Whereas early evidence suggested that psychiatric admissions normalized within weeks, we sought to examine the longer-lasting impacts on the psychiatric inpatient population beyond this initial recovery period.

**Methods.** We investigated the characteristics of patients admitted to eight urban and rural psychiatric hospitals in Ontario during the pandemic's first year, divided into lockdown and post-lockdown periods, compared with the same time period pre-pandemic

**Results.** The mean number of daily admissions decreased from 16.45 (95% C.I. = [15.49, 17.41]) pre-pandemic to 13.31 (95% C.I. = [12.08, 14.54]) during lockdown, and did not fully recover to pre-pandemic levels post-lockdown, 15.42 (95% C.I. = [14.60, 16.24]), representing a 6% reduction. Post-lockdown, the proportion of involuntary patients (N = 2277, 55.1%, 95% C.I. = [53.59, 56.62]) and patients diagnosed with a psychotic disorder (N = 1454, 35.2%, 95% C.I. = [35.19, 33.73]) or personality disorder (N = 126, 3%, 95% C.I. = [2.52, 3.57]) were higher than pre-pandemic; in contrast, symptoms of social withdrawal (M = 4.17, 95% C.I. = [4.02, 4.31]) and depression (M = 2.90, 95% C.I. = [2.80, 3.01]) were lower.

**Interpretation.** Psychiatric admissions did not fully recover to pre-pandemic levels and reflected higher acuity in the post-pandemic psychiatric patient population. Psychiatric services must prepare to respond to the increased acuity through interventions for patients, workforce planning, and mental health supports for staff.

## **Post-Pandemic Recovery in Psychiatric Services: A Comparison of Inpatient Admissions and Acuity across Three Time Periods**

### **Introduction**

The World Health Organization declared the novel coronavirus disease 2019 (COVID-19) a pandemic on March 11, 2020 (1). Despite substantial increases in population anxiety and depression during the pandemic internationally (2-4), psychiatric services were often limited or restricted to urgent care, resulting in reduced psychiatric admissions during initial lockdowns (5-8). Within 8 to 12 weeks, admission rates approached pre-pandemic levels (e.g. 9-11); however, there is little research into whether this apparent recovery continued in the longer term.

Furthermore, changes in diagnosis, clinical presentation, and legal status suggest increased acuity of the admission population that are important for planning clinical services (e.g., staffing ratios, skillsets, interventions). This includes increased proportions of psychosis and mania (12-14) as well as suicidal behaviour (9-10). The proportion of involuntary admissions also increased (e.g. 6, 15-17), suggesting increased burden to hospitals due to their association with acute illness and aggression (18-19), longer stays, readmissions (20), and use of restraints (21).

Despite continued pandemic-related pressures on the healthcare system, little is known about post-lockdown impacts. In Ontario, Canada, increased psychiatric hospitalization rates for psychotic and substance-related disorders appeared to return to pre-pandemic levels by the time initial restrictions were eased in June 2020 (11). In contrast, reduced hospitalizations for mood, trauma, and stressor-related disorders had not yet returned to normal (11). Internationally, there seems to have been an increase in involuntary admissions to mental health facilities even prior to COVID-19 (18-19, 22), and further research is needed to determine whether the lockdown trend represents a continuation or temporary exacerbation of that pattern. Thus, there is a need to

1  
2  
3 examine whether changes in admission patterns and characteristics were sustained, to effectively  
4 plan for inpatient psychiatric services under the now prolonged pandemic timeline. The few  
5  
6 existing longer-term studies did not distinguish between lockdown and post-lockdown (13, 16),  
7  
8 did not investigate involuntary admissions (11), or explored post-lockdown only up to mid-2020  
9  
10 (9-10). The objective of the current study was to examine changes in psychiatric admissions,  
11  
12 clinical presentation, and legal status of patients admitted to psychiatric hospitals in Ontario,  
13  
14 Canada. We investigated changes from pre-pandemic to the initial lockdown and through post-  
15  
16 lockdown up to March 2021.  
17  
18  
19  
20

## 21 **Methods**

### 22 **Sample**

23  
24 We accessed a cross-sectional sample encompassing admissions to eight Ontario  
25  
26 psychiatric hospitals. Informed consent was not obtained due to the retrospective, secondary  
27  
28 analysis of anonymized healthcare data meeting the criteria for a waiver of consent (23). We  
29  
30 included all available cases with unique identifiers, excluding duplicate admissions in each time  
31  
32 period; the total sample was 9,848 cases. Over half ( $n = 5423$ , 55%) were identified as male, 45%  
33  
34 ( $n = 4411$ ) as women, and 14 (0.1%) as nonbinary. The mean age on admission was 42.75 years  
35  
36 ( $SD = 18.22$ ), and the median length of stay was 19 days (IQR = 9-50).  
37  
38  
39  
40  
41

### 42 **Study Time Periods**

43  
44 We defined *lockdown* from the date the state of emergency was declared in Ontario to the  
45  
46 date the first major restrictions were lifted: March 17, 2020, to June 21, 2020 (97 days). We  
47  
48 defined *post-lockdown* as beginning June 22, 2020 and continuing for a year after the emergency  
49  
50 was declared, up to March 16, 2021 (268 days). We identified a *pre-pandemic* period of the same  
51  
52  
53  
54  
55  
56  
57  
58  
59  
60

1  
2  
3 duration and calendar months the year before the pandemic, June 22, 2019, to March 16, 2020  
4  
5 (269 days, including leap day).  
6

### 7 8 **Variables**

9  
10 We used psychiatric admission data extracted from the Ontario Mental Health Reporting  
11 System (OMHRS). OMHRS data is collected using the Resident Assessment Instrument —  
12 Mental Health (RAI-MH) (24). RAI-MH is a standardized clinical instrument used to regularly  
13 assess those receiving inpatient mental healthcare with adequate inter-rater reliability (> 80%  
14 agreement) and convergent validity reported for inpatient settings (24). Variables included: sex  
15 (male, female); age at admission (mean age and four age categories: under 25, 25 to 44, 45 to 64  
16 and 65 and older); marital status (“has ever had a partner”, yes or no); education level (“did not  
17 complete high school”, yes or no); “income insecurity” (no income other than social assistance,  
18 yes or no). We used admission and discharge dates to determine the length of stay. As in  
19 previous studies in this field, we categorized length of stay into four groups: 7 days or less, 8-30,  
20 30-90 days, and more than 90 days, which captured patients not yet discharged as of June 30,  
21 2021.  
22  
23  
24  
25  
26  
27  
28  
29  
30  
31  
32  
33  
34  
35  
36

37 For involuntary status, we included applications or orders for a psychiatric assessment  
38 (Form 1 or 2), involuntary (Form 3 or 4), and informal status (admitted with designated decision-  
39 maker consent).  
40  
41  
42  
43

44 Primary DSM-5 psychiatric diagnoses were collapsed into seven categories:  
45 schizophrenia and other psychotic disorder, substance use disorder, mood or anxiety disorder,  
46 neurocognitive disorder, personality disorder, neurodevelopmental disorder, and other disorder.  
47  
48  
49

50 For clinical presentation, we extracted scores on four RAI-MH symptom scales and two  
51 aggression scales, as documented by staff from observations during the first 3 days of admission.  
52  
53  
54  
55  
56  
57  
58  
59  
60

1  
2  
3 The *Depression Severity Index* scale has 5 items (e.g., made negative statements, expressions of  
4 guilt/shame), each scored from 0 (not present) to 3 (present daily); total score range 0 – 15.  
5  
6 Depression severity scores  $\geq 3$  double the likelihood of a mood disorder diagnosis (25). The  
7  
8 *Cognitive Performance Scale* identifies patients as having from intact (0) to very severe (6)  
9  
10 cognitive performance using 3 items concerning short term memory/recall, daily decision-  
11  
12 making, and making self understood. Cognitive performance scores  $\geq 3$  increase the likelihood  
13  
14 of a dementia diagnosis by 14 times (25). The *Positive Symptom Scale* has 8 items (e.g.,  
15  
16 hallucinations, inflated self-worth), each scored from 0 (not present) to 3 (present daily); total  
17  
18 score range 0 – 24. The *Social Withdrawal Scale* has 6 items (e.g., decreased energy, reduced  
19  
20 interaction), each scored from 0 (not present) to 3 (present daily); total score range 0 – 18). The  
21  
22 *Aggressive Behaviour Scale* includes 4 items (e.g., verbal abuse, physical abuse”), each scored  
23  
24 from 0 (not exhibited) to 3 (exhibited daily); total score range 0 – 12, and *Violence Sum* sums 3  
25  
26 items (violent acts, intimidation, ideation”), scored from 0 (never) to 5 (in the last 3 days); total  
27  
28 score range 0 –15. Research in multiple settings and locations found that RAI scales met internal  
29  
30 consistencies of  $\alpha \geq .70$  (26) with average inter-rater agreement Kappa = 0.70 (27).  
31  
32  
33  
34  
35  
36  
37

### 38 **Statistical Analysis**

39  
40 To test for differences across time periods, we used one-way analysis of variance  
41  
42 (ANOVA) for continuous measures (i.e., RAI–MH clinical scale scores), with post hoc  
43  
44 comparisons between time periods using Tukey's post hoc test. For categorical measures (i.e.,  
45  
46 diagnosis, involuntary status), we used Pearson's Chi-squared test with Bonferroni adjustment  
47  
48 (28). This was a complete data set with no missing data. Education status was identified as  
49  
50 unknown in 26% of cases, and the primary diagnosis was identified as not applicable in two  
51  
52 patients.  
53  
54  
55  
56  
57  
58  
59  
60

### Ethics Approval

This study is exempt from REB approval according to the Tri-Council Policy Statement, 2nd edition (TCPS), as the research relies exclusively on publicly available information, which does not include identifiable information. (Article 2.2).

### Results

There were 4425 unique patients (45%) admitted pre-pandemic, 1291 (13%) during lockdown, and 4132 (42%) post-lockdown. Daily admission rates (Figure 1) differed across time periods,  $F(2, 631) = 6.764, p < .001, \eta^2 = 0.021, 95\% \text{ C.I.} = [.004, .046]$ . There was a significant decrease in daily admissions during lockdown ( $M = 13.31, SD = 6.11$ ) compared to pre-pandemic ( $M = 16.45, SD = 8.00, p < 0.001, 95\% \text{ C.I.} = [-5.16, -1.13]$ ). The admission rate during post-lockdown ( $M = 15.42, SD = 6.80$ ) was significantly higher than lockdown ( $p = .038, 95\% \text{ C.I.} = [0.09, 4.12]$ ), but not statistically different from pre-pandemic ( $p = .225, 95\% \text{ C.I.} = [-2.50, 0.44]$ ).

There were no significant time-period differences in gender, educational attainment, or income security (Table 1). The proportion of admitted patients under the age of 25 was significantly lower during lockdown than pre-pandemic, but no longer different post-lockdown. The proportion of patients who never had a partner increased during lockdown and became significantly higher during post-lockdown than pre-pandemic. Admissions were shorter during lockdown; post-lockdown, the proportion of 8-30 day stays continued to significantly increase compared to pre-pandemic, and 30-90 day stays significantly decreased.

### Legal Status and Diagnosis

During lockdown, the proportion of involuntary admissions significantly increased, and this trend was sustained post-lockdown, whereby the total percentage increased by 6 percentage

1  
2  
3 points from pre-pandemic to post-lockdown (Table 2). During lockdown, the proportion of  
4  
5 patients diagnosed with a psychotic disorder significantly increased by 9% and this proportion  
6  
7 remained significantly elevated post-lockdown, up by 4% over pre-pandemic (Table 2).

8  
9  
10 Although admissions for patients diagnosed with personality disorder were substantially lower  
11  
12 than those for other diagnostic groups, their admissions also increased significantly during  
13  
14 lockdown through to post-lockdown. There was a corresponding reduction in the proportions of  
15  
16 patients with a mood or anxiety disorder, substance use disorder, or neurocognitive disorder.  
17  
18 However, this trend was sustained post-lockdown only for substance use disorder and  
19  
20 neurocognitive disorder.  
21  
22

### 23 24 **Clinical Presentation**

25  
26 Depression and social withdrawal symptom scores were significantly reduced during  
27  
28 lockdown, and did not return to pre-pandemic levels by the post-pandemic period (Table 3 and  
29  
30 Figure 2). Patients exhibited higher rates of positive symptoms and violence during lockdown  
31  
32 compared to pre-pandemic; however, post-lockdown, these scales were no longer significantly  
33  
34 elevated compared to pre-pandemic. Patients did not score significantly higher on the aggression  
35  
36 scale during the pandemic and there was no difference in patients' cognitive performance ratings  
37  
38 across time (Table 3 and Figure 3).  
39  
40

### 41 42 **Interpretation**

43  
44 This study of psychiatric hospital admissions in Ontario during the pandemic lockdown  
45  
46 found that daily admission rates dipped by 19%, consistent with previous studies (10, 13-14, 29).  
47  
48 Unlike most previous research, we investigated the extent to which admission rates recovered in  
49  
50 the remaining year after lockdown and found that admissions remained at 6% below the pre-  
51  
52 pandemic rate. While total admissions for all diagnostic groups decreased during lockdown, the  
53  
54  
55  
56  
57  
58  
59  
60



1  
2  
3 proportion of cases with psychotic disorders increased, particularly relative to mood disorders.  
4  
5 Involuntary admissions increased and became dominant during lockdown, at almost 58%. The  
6  
7 predominance of patients with psychotic disorders and involuntary admissions was sustained into  
8  
9 the longer post-lockdown period, suggesting an ongoing elevated operational burden on  
10  
11 psychiatric hospitals.  
12  
13

14  
15 Our finding of increased proportions of psychotic disorders aligns with previous work  
16  
17 (11, 13, 16), and extends evidence to a longer post-lockdown period when it was partly  
18  
19 sustained. These changes, along with higher positive symptoms and aggressive behaviour scores,  
20  
21 suggest increased acuity in the population served post-pandemic. Similarly, the evidence of  
22  
23 increased involuntary admissions is consistent with existing studies of lockdown (6, 13, 15-16)  
24  
25 and post-lockdown (9). We examined a longer post-lockdown period, and used more equivalent  
26  
27 pre- and post-lockdown time periods. Thus, despite substantial reductions in psychiatric hospital  
28  
29 admissions, it appears that priority was given to persons with serious mental illness in terms of  
30  
31 active psychotic symptoms and behaviour that was difficult to manage.  
32  
33  
34

35  
36 An increase in involuntary admissions is concerning because they create an  
37  
38 administrative burden, are distressing to patients' informal caregivers (30), and are considered by  
39  
40 some scholars to represent a failure of psychiatric treatment (31). An increase in clinical acuity is  
41  
42 problematic because an inpatient population that is more mentally ill (i.e., increased diagnosis of  
43  
44 psychosis, increased positive symptoms) requires more intensive treatment than previously. The  
45  
46 psychiatric system might have recovered up to the same number of admissions, but each  
47  
48 admission may now be more costly because beds are filled with patients who are likely to be  
49  
50 more treatment-resistant, prone to readmissions, and in need of individualized care and  
51  
52 supervision. Reduced service for mood, anxiety, and substance use disorders is a concern  
53  
54  
55  
56  
57  
58  
59  
60

1  
2  
3 because research has shown that these problems increased in the general population during the  
4 pandemic (3-4, 33-34). With healthcare providers reporting an increased demand for virtual  
5 mental health services, perhaps less acute patients found psychiatric support through virtual  
6 healthcare (35-37). However, providers have indicated a sharp increase in demand for virtual  
7 mental healthcare services that, without a corresponding increase in resources, has impacted  
8 those who receive care and providers alike (38).  
9

10  
11  
12  
13  
14  
15  
16  
17 Psychiatric patient populations may be more challenging to care for post-pandemic,  
18 requiring commensurate human resource planning and development. For example, psychiatric  
19 healthcare organizations should analyze whether their current workforce, already challenged by  
20 the pressures of the pandemic, can meet the ongoing needs of the inpatient population, and  
21 determine the steps to meet future staffing needs. These plans may involve training more staff in  
22 evidence-based guidelines for psychosis and supporting the development of skillsets needed to  
23 care for more ill and disturbed individuals. Aggression against hospital staff and chronic  
24 stressors in the provision of psychiatric care are associated with trauma among psychiatric  
25 workers (32), adding to pandemic-related stressors. Consequently, there is a growing need to  
26 support psychiatric healthcare workers through wellness activities and mental health supports  
27 such as critical incident debriefing that is evidence-based and trauma-informed, and appropriate  
28 assessment and treatment for staff experiencing trauma, anxiety, and depression.  
29  
30  
31  
32  
33  
34  
35  
36  
37  
38  
39  
40  
41  
42  
43

44  
45 Our study included a large sample using anonymous, publicly available data  
46 encompassing non-forensic admissions to eight Ontario psychiatric hospitals. We used the RAI-  
47 MH, a standardized and well-validated assessment tool used in hospitals across Canada  
48 (additional RAI instruments are used internationally, 26), which enhances the potential for our  
49 findings to generalize to other health regions in Canada and elsewhere. Some knowledge gaps  
50  
51  
52  
53  
54  
55  
56  
57  
58  
59  
60

1  
2  
3 remain, and future research should investigate multiple admissions and admissions not associated  
4  
5 with a health insurance number, which likely indicates under-represented groups such as patients  
6  
7 without a valid Ontario health insurance card. Future research on forensic admissions is  
8  
9 warranted to investigate the pandemic's impact on forensic psychiatric services and may inform  
10  
11 understanding of the rise in involuntary admissions. Future research is needed to determine  
12  
13 workforce planning and development needs in light of the apparent post-pandemic shift towards  
14  
15 higher acuity in the psychiatric inpatient population, and to investigate impacts on patient health  
16  
17 outcomes.  
18  
19  
20

### 21 **Limitations**

22  
23  
24 The study was a secondary analysis of available, anonymized health records using a  
25  
26 retrospective, cross-sectional design. Consequently, we could not examine the circumstances  
27  
28 surrounding admissions, such as whether pandemic-related restrictions contributed. We defined  
29  
30 the lockdown period according to the Government of Ontario's declaration of an emergency. In  
31  
32 some cases, the restrictions may have eased sooner, so we potentially under-estimated the acuity  
33  
34 of the psychiatric inpatient population during lockdown. However, by examining the post-  
35  
36 lockdown period for the remaining year, we illustrated how the population acuity was sustained  
37  
38 for a long period. We excluded multiple admissions per time period; nevertheless, we found that  
39  
40 lockdown admissions for higher acuity patients increased proportionately and absolutely, and  
41  
42 positive symptom and violence scores also increased.  
43  
44  
45

### 46 **Conclusion**

47  
48  
49 This study examined the characteristics of patients admitted to eight rural and urban  
50  
51 psychiatric hospitals across Ontario during the pandemic. Admissions declined during lockdown  
52  
53 and did not fully recover within a year. Changes in inpatient characteristics reflected higher  
54  
55  
56  
57  
58  
59  
60

1  
2  
3 acuity, including increases in schizophrenia and other psychotic disorders, positive symptoms  
4 and aggression, and involuntary admissions. Psychiatric healthcare services must prepare to  
5 respond to the increased acuity, behavioural, and legal burdens through commensurate human  
6 resource planning and development and the advancement of staff wellness services and mental  
7 health supports.  
8  
9  
10  
11  
12  
13  
14  
15  
16

17 **Competing interests:** We have no known conflict of interest to disclose.  
18

19 **Contributors:** Elke Ham, N. Zoe Hilton and Soyeon Kim conceptualized and designed this  
20 study, Soyeon Kim acquired the data, Elke Ham and Jennifer Crawford analyzed the data and  
21 interpreted the results. Elke Ham drafted the manuscript, and N. Zoe Hilton, Jennifer Crawford  
22 and Soyeon Kim revised it critically for important critical content. Elke Ham, N. Zoe Hilton,  
23 Jennifer Crawford and Soyeon Kim gave final approval and agreed as guarantor of the  
24 work.  
25  
26  
27  
28  
29  
30  
31  
32

33 **Funding:** This study did not involve external funding sources.  
34

35 **Data Sharing:** Data on which this study is based was extracted from the Ontario Mental Health  
36 Reporting System (OMHRS). Similar data is available through the Canadian Institute for Health  
37 Information to researchers, decision-makers and health managers at [https://www.cihi.ca/en/data-](https://www.cihi.ca/en/data-inquiry-form)  
38 [inquiry-form](https://www.cihi.ca/en/data-inquiry-form)  
39  
40  
41  
42  
43

44 **Supplemental information:** n/a  
45  
46  
47  
48  
49  
50  
51  
52  
53  
54  
55  
56  
57  
58  
59  
60

## References

1. Timeline of WHO's response to COVID-19. Available from:  
<https://www.who.int/emergencies/diseases/novel-coronavirus-2019/interactive-timeline>
2. Betini GS, Hirdes JP, Adekpedjou R, Perlman CM, Huculak N, Hébert P. Longitudinal Trends and Risk Factors for Depressed Mood Among Canadian Adults During the First Wave of COVID-19. *Frontiers in Psychiatry* [Internet]. 2021 [cited 2022 Feb 28];12. Available from: <https://www.frontiersin.org/article/10.3389/fpsy.2021.666261>
3. Robinson E, Sutin AR, Daly M, Jones A. A systematic review and meta-analysis of longitudinal cohort studies comparing mental health before versus during the COVID-19 pandemic in 2020. *J Affect Disord* [Internet]. 2022 Jan 1 [cited 2022 Mar 8];296:567–76. Available from: <https://www.ncbi.nlm.nih.gov/pmc/articles/PMC8578001/>
4. Xiong J, Lipsitz O, Nasri F, Lui LMW, Gill H, Phan L, et al. Impact of COVID-19 pandemic on mental health in the general population: A systematic review. *J Affect Disord* [Internet]. 2020 Dec 1 [cited 2022 Mar 2];277:55–64. Available from: <https://www.ncbi.nlm.nih.gov/pmc/articles/PMC7413844/>
5. Adorjan K, Pogarell O, Pröbstl L, Rüb M, Wiegand HF, Tüscher O, et al. Impact of the COVID-19 pandemic on the care situation in psychiatric hospitals in Germany. *Nervenarzt* [Internet]. 2021 Jun [cited 2022 Feb 25];92(6):562–70. Available from: <https://search.ebscohost.com/login.aspx?direct=true&db=cmedm&AN=34003321&site=ehost-live>
6. Bonello F, Zammit D, Grech A, Camilleri V, Cremona R. Effect of COVID-19 pandemic on mental health hospital admissions: Comparative population-based study. *BJPsych Open* [Internet]. 2021 Sep [cited 2022 Jan 19];7(5). Available from: <https://www.cambridge.org/core/journals/bjpsych-open/article/effect-of-covid19->

- 1  
2  
3 pandemic-on-mental-health-hospital-admissions-comparative-populationbased-  
4 study/E0216143505E83D0B4D1B5CCCED49B54  
5  
6  
7
- 8 7. Gómez-Ramiro M, Fico G, Anmella G, Vázquez M, Sagué-Vilavella M, Hidalgo-Mazzei  
9 D, et al. Changing trends in psychiatric emergency service admissions during the  
10 COVID-19 outbreak: Report from a worldwide epicentre. *J Affect Disord* [Internet].  
11  
12 COVID-19 outbreak: Report from a worldwide epicentre. *J Affect Disord* [Internet].  
13  
14 2021 Mar 1 [cited 2022 Feb 11];282:26–32. Available from:  
15  
16 <https://www.ncbi.nlm.nih.gov/pmc/articles/PMC7765763/>  
17  
18
  - 19 8. Tuczyńska M, Matthews-Kozanecka M, Baum E. Accessibility to non-COVID health  
20 services in the world during the COVID-19 pandemic: Review. *Front Public Health*  
21  
22 [Internet]. 2021 Dec 16 [cited 2022 Mar 21];9:760795. Available from:  
23  
24 <https://www.ncbi.nlm.nih.gov/pmc/articles/PMC8716399/>  
25  
26
  - 27 9. Ambrosetti J, Macheret L, Folliet A, Wullschleger A, Amerio A, Aguglia A, et al. Impact  
28 of the COVID-19 pandemic on psychiatric admissions to a large Swiss emergency  
29 department: An observational study. *International Journal of Environmental Research and*  
30  
31 *Public Health*. 2021;18(3):1174.  
32  
33  
34
  - 35 10. Boldrini T, Girardi P, Clerici M, Conca A, Creati C, Di Cicilia G, et al. Consequences of  
36 the COVID-19 pandemic on admissions to general hospital psychiatric wards in Italy:  
37  
38 Reduced psychiatric hospitalizations and increased suicidality. *Prog*  
39  
40 *Neuropsychopharmacol Biol Psychiatry* [Internet]. 2021 Aug 30 [cited 2022 Feb  
41  
42 11];110:110304. Available from:  
43  
44 <https://www.ncbi.nlm.nih.gov/pmc/articles/PMC8569419/>  
45  
46
  - 47 11. Saunders NR, Toulany A, Deb B, Strauss R, Vigod SN, Guttman A, et al. Acute mental  
48  
49 health service use following onset of the COVID-19 pandemic in Ontario, Canada: A  
50  
51  
52  
53  
54  
55  
56  
57  
58  
59  
60

- 1  
2  
3 trend analysis. *CMAJ Open* [Internet]. 2021 Nov 16 [cited 2022 Mar 31];9(4):E988–97.  
4 Available from: <https://www.ncbi.nlm.nih.gov/pmc/articles/PMC8598241/>  
5  
6  
7
- 8 12. Abbas MJ, Kronenberg G, McBride M, Chari D, Alam F, Mukaetova-Ladinska E, et al.  
9 The early impact of the COVID-19 pandemic on acute care mental health services.  
10 *Psychiatric Services* [Internet]. 2020 Oct 20 [cited 2022 Apr 5];72(3):242-6. Available  
11 from: <https://ps.psychiatryonline.org/doi/full/10.1176/appi.ps.202000467>  
12  
13  
14
- 15 13. Davies M, Hogarth L. The effect of COVID-19 lockdown on psychiatric admissions: role  
16 of gender. *BJPsych open* [Internet]. 2021 Jul [cited 2022 Apr 5];7(4):e112. Available  
17 from:  
18  
19 [https://www.cambridge.org/core/product/identifier/S2056472421009273/type/journal\\_article](https://www.cambridge.org/core/product/identifier/S2056472421009273/type/journal_article)  
20  
21  
22  
23
- 24 14. Jagadheesan K, Danivas V, Itrat Q, Sekharan L, Lakra APV. COVID-19 and psychiatric  
25 admissions: An observational study of the first six months of lockdown in Melbourne.  
26 *Psychiatry Res* [Internet]. 2021 Jun [cited 2022 Apr 5];300:113902. Available from:  
27  
28 <https://www.ncbi.nlm.nih.gov/pmc/articles/PMC7986313/>  
29  
30  
31  
32
- 33 15. Ambrosetti J, Macheret L, Folliet A, Wullschleger A, Amerio A, Aguglia A, et al.  
34  
35  
36  
37  
38  
39  
40  
41  
42  
43  
44  
45  
46  
47  
48  
49  
50  
51  
52  
53  
54  
55  
56  
57  
58  
59  
60
- Psychiatric emergency admissions during and after COVID-19 lockdown: Short-term  
impact and long-term implications on mental health. *BMC Psychiatry* [Internet]. 2021  
Sep 24 [cited 2022 Apr 14];21(1):1-8. Available from: <https://doi.org/10.1186/s12888-021-03469-8>
16. Fasshauer JM, Bollmann A, Hohenstein S, Mouratis K, Hindricks G, Meier-Hellmann A,  
et al. Impact of COVID-19 pandemic on involuntary and urgent inpatient admissions for  
psychiatric disorders in a German-wide hospital network. *J Psychiatr Res* [Internet]. 2021  
Oct [cited 2022 Apr 5];142:140–3. Available from:  
<https://www.ncbi.nlm.nih.gov/pmc/articles/PMC8417753/>

- 1  
2  
3 17. Hörmann C, Bandli A, Bankwitz A, De Bardeci M, Rüesch A, De Araujo TV, et al.  
4  
5 Suicidal ideations and suicide attempts prior to admission to a psychiatric hospital in the  
6  
7 first six months of the COVID-19 pandemic: Interrupted time-series analysis to estimate  
8  
9 the impact of the lockdown and comparison of 2020 with 2019. *BJPsych open* [Internet].  
10  
11 2022 Jan [cited 2022 Feb 7];8(1):e24. Available from:  
12  
13 [https://www.cambridge.org/core/product/identifier/S2056472421010723/type/journal\\_](https://www.cambridge.org/core/product/identifier/S2056472421010723/type/journal_article)  
14  
15 [art](https://www.cambridge.org/core/product/identifier/S2056472421010723/type/journal_article)  
16  
17 [icle](https://www.cambridge.org/core/product/identifier/S2056472421010723/type/journal_article)  
18
- 19 18. Lebenbaum M, Chiu M, Vigod S, Kurdyak P. Prevalence and predictors of involuntary  
20  
21 psychiatric hospital admissions in Ontario, Canada: A population-based linked  
22  
23 administrative database study. *BJPsych open* [Internet]. 2018 Mar [cited 2022 Apr  
24  
25 13];4(2):31–8. Available from:  
26  
27 [https://www.cambridge.org/core/product/identifier/S2056472417000047/type/journal\\_](https://www.cambridge.org/core/product/identifier/S2056472417000047/type/journal_article)  
28  
29 [art](https://www.cambridge.org/core/product/identifier/S2056472417000047/type/journal_article)  
30  
31 [icle](https://www.cambridge.org/core/product/identifier/S2056472417000047/type/journal_article)  
32
- 33 19. Seifert J, Ihlefeld C, Zindler T, Eberlein CK, Deest M, Bleich S, et al. Sociodemographic,  
34  
35 circumstantial, and psychopathological predictors of involuntary admission of patients  
36  
37 with acute psychosis. *Psychiatry International* [Internet]. 2021 Aug 5 [cited 2022 Apr  
38  
39 14];2(3):310–24. Available from: <https://www.mdpi.com/2673-5318/2/3/24>  
40  
41
- 42 20. Kallert TW, Glöckner M, Schützwohl M. Involuntary vs. voluntary hospital admission: A  
43  
44 systematic literature review on outcome diversity. *Eur Arch Psychiatry Clin Neurosc*  
45  
46 [Internet]. 2008 Jun [cited 2022 May 5];258(4):195–209. Available from:  
47  
48 <http://link.springer.com/10.1007/s00406-007-0777-4>  
49  
50
- 51 21. Pérez-Revuelta JI, Torrecilla-Olavarrieta R, García-Spínola E, López-Martín Á,  
52  
53 Guerrero-Vida R, Mongil-San Juan JM, et al. Factors associated with the use of  
54  
55  
56  
57  
58  
59  
60



- 1  
2  
3 mechanical restraint in a mental health hospitalization unit: 8-year retrospective analysis.  
4  
5 J Psychiatr Ment Health Nurs [Internet]. 2021 Dec [cited 2022 May 5];28(6):1052–64.  
6  
7 Available from: <https://onlinelibrary.wiley.com/doi/10.1111/jpm.12749>  
8  
9
- 10 22. Keown P, Mercer G, Scott J. Retrospective analysis of hospital episode statistics,  
11  
12 involuntary admissions under the Mental Health Act 1983, and number of psychiatric  
13  
14 beds in England 1996-2006. *BMJ*. 2008;337:a1837.  
15  
16
- 17 23. Canadian Institutes of Health Research. Tri-Council policy statement: ethical conduct for  
18  
19 research involving humans. [Internet]. 2018 [cited 2021 Jul 8]. Available from:  
20  
21 [http://publications.gc.ca/collections/collection\\_2019/irsc-cihr/RR4-2-2019-eng.pdf](http://publications.gc.ca/collections/collection_2019/irsc-cihr/RR4-2-2019-eng.pdf)  
22  
23
- 24 24. Hirdes JP, Smith TF, Rabinowitz T, Yamauchi K, Pérez E, Telegdi NC, et al. The  
25  
26 resident assessment instrument-mental health (RAI-MH): Inter-rater reliability and  
27  
28 convergent validity. *The Journal of Behavioral Health Services & Research* [Internet].  
29  
30 2002 Nov [cited 2022 Jun 9];29(4):419–32. Available from:  
31  
32 <http://link.springer.com/10.1007/BF02287348>  
33  
34
- 35 25. Perlman CM, Hirdes JP, Barbaree H, Fries BE, McKillop I, Morris JN, et al.  
36  
37 Development of mental health quality indicators (MHQIs) for inpatient psychiatry based  
38  
39 on the interRAI mental health assessment. *BMC Health Serv Res*. 2013;13(1):1-12.  
40  
41
- 42 26. Hirdes JP, van Everdingen C, Ferris J, Franco-Martin M, Fries BE, Heikkilä J, et al. The  
43  
44 interRAI suite of mental health assessment instruments: An integrated system for the  
45  
46 continuum of care. *Frontiers in Psychiatry* [Internet]. 2020 [cited 2022 Jun 10];10:926.  
47  
48 Available from: <https://www.frontiersin.org/article/10.3389/fpsyt.2019.00926>  
49  
50
- 51 27. Hirdes JP, Ljunggren G, Morris JN, Frijters DH, Finne Soveri H, Gray L, et al.  
52  
53 Reliability of the interRAI suite of assessment instruments: A 12-country study of an  
54  
55  
56  
57  
58  
59  
60

1  
2  
3 integrated health information system. BMC Health Serv Res [Internet]. 2008 Dec [cited  
4 2022 Jan 27];8(1):1-11. Available from:

5  
6  
7 <https://bmchealthservres.biomedcentral.com/articles/10.1186/1472-6963-8-277>

8  
9  
10 28. Beasley TM, Schumacker RE. Multiple regression approach to analyzing contingency  
11 tables: Post hoc and planned comparison procedures. The Journal of Experimental  
12 Education [Internet]. 1995 Oct [cited 2022 Feb 18];64(1):79–93. Available from:

13  
14  
15 <http://www.tandfonline.com/doi/abs/10.1080/00220973.1995.9943797>

16  
17  
18 29. Kim HK, Carvalho AF, Gratzner D, Wong AHC, Gutzin S, Husain MI, et al. The impact  
19 of COVID-19 on psychiatric emergency and inpatient services in the first month of the  
20 pandemic in a large urban mental health hospital in Ontario, Canada. Front Psychiatry  
21 [Internet]. 2021 Apr 23 [cited 2022 Feb 25];12:563906. Available from:

22  
23  
24  
25  
26 [https://search.ebscohost.com/login.aspx?direct=true&db=cmedm&AN=33967842&site=e](https://search.ebscohost.com/login.aspx?direct=true&db=cmedm&AN=33967842&site=ehost-live)  
27  
28  
29  
30  
31  
32  
33  
34  
35  
36  
37  
38  
39  
40  
41  
42  
43  
44  
45  
46  
47  
48  
49  
50  
51  
52  
53  
54  
55  
56  
57  
58  
59  
60

30  
31  
32 30. Stuart R, Akther SF, Machin K, Persaud K, Simpson A, Johnson S, et al. Carers'  
33 experiences of involuntary admission under mental health legislation: Systematic review  
34 and qualitative meta-synthesis. BJPsych open [Internet]. 2020 Mar [cited 2022 Apr  
35 21];6(2):e19. Available from:

36  
37  
38  
39  
40  
41  
42 [https://www.cambridge.org/core/product/identifier/S2056472419001017/type/journal\\_art](https://www.cambridge.org/core/product/identifier/S2056472419001017/type/journal_article)  
43  
44  
45  
46  
47  
48  
49  
50  
51  
52  
53  
54  
55  
56  
57  
58  
59  
60

50  
51  
52 31. Coulter A, Schuermeyer I, Sola C. Evaluating ineffective treatments: A proposed model  
53 for discussing futility in psychiatric illness. Harv Rev Psychiatry [Internet]. 2021 May  
54 [cited 2022 Jun 9];29(3):240–5. Available from:

55  
56  
57 <https://journals.lww.com/10.1097/HRP.0000000000000293>

- 1  
2  
3  
4  
5  
6  
7  
8  
9  
10  
11  
12  
13  
14  
15  
16  
17  
18  
19  
20  
21  
22  
23  
24  
25  
26  
27  
28  
29  
30  
31  
32  
33  
34  
35  
36  
37  
38  
39  
40  
41  
42  
43  
44  
45  
46  
47  
48  
49  
50  
51  
52  
53  
54  
55  
56  
57  
58  
59  
60
32. Hilton NZ, Ham E, Rodrigues NC, Kirsh B, Chapovalov O, Seto MC. Contribution of critical events and chronic stressors to PTSD symptoms among psychiatric workers. *PS* [Internet]. 2020 Mar 1 [cited 2020 Nov 24];71(3):221–7. Available from: <https://psychiatryonline.org/doi/10.1176/appi.ps.201900226>
33. Carvalho S, Coelho CG, Kluwe-Schiavon B, Magalhães J, Leite J. The acute impact of the early stages of COVID-19 pandemic in people with pre-existing psychiatric disorders: A systematic review. *International Journal of Environmental Research and Public Health* [Internet]. 2022 Jan [cited 2022 May 10];19(9):5140. Available from: <https://www.mdpi.com/1660-4601/19/9/5140>
34. Dozois DJ. Anxiety and depression in Canada during the COVID-19 pandemic: A national survey. *Canadian Psychology/Psychologie canadienne*. 2021;62(1):136-42.
35. Saunders NR, Kurdyak P, Stukel TA, Strauss R, Fu L, Guan J, et al. Utilization of physician-based mental health care services among children and adolescents before and during the COVID-19 pandemic in Ontario, Canada. *JAMA Pediatr* [Internet]. 2022 Apr 4 [cited 2022 Jun 29];176(4):e216298. Available from: <https://jamanetwork.com/journals/jamapediatrics/fullarticle/2788906>
36. Donnelly C, Ashcroft R, Bobbette N, Mills C, Mofina A, Tran T, et al. Interprofessional primary care during COVID-19: A survey of the provider perspective. *BMC Fam Pract* [Internet]. 2021 Dec [cited 2022 Jun 29];22(1):31. Available from: <https://bmcfampract.biomedcentral.com/articles/10.1186/s12875-020-01366-9>
37. Andersen JA, Rowland B, Gloster E, McElfish PA. Telehealth utilization during COVID-19 among people with diagnosed mental health conditions. *Telemedicine and e-Health*

1  
2  
3 [Internet]. 2022 May 1 [cited 2022 Jun 29];28(5):743–6. Available from:  
4  
5 <https://www.liebertpub.com/doi/10.1089/tmj.2021.0356>  
6

- 7  
8 38. Ashcroft R, Donnelly C, Dancey M, Gill S, Lam S, Kourgiantakis T, Adamson K,  
9  
10 Verrilli D, Dolovich L, Kirvan A, Mehta K. Primary care teams' experiences of  
11  
12 delivering mental health care during the COVID-19 pandemic: a qualitative study. BMC  
13  
14 family practice. 2021 Dec;22(1):1-2.  
15  
16  
17  
18  
19  
20  
21  
22  
23  
24  
25  
26  
27  
28  
29  
30  
31  
32  
33  
34  
35  
36  
37  
38  
39  
40  
41  
42  
43  
44  
45  
46  
47  
48  
49  
50  
51  
52  
53  
54  
55  
56  
57  
58  
59  
60

Confidential

## POST-PANDEMIC RECOVERY AND PSYCHIATRIC INPATIENT ACUITY

1

**Table 1***Changes in Admission Characteristics during Pre-pandemic, Lockdown and Post-lockdown*

|                                    | Pre-pandemic<br>(N=4425) | Lockdown<br>(N=1291)      | Post-lockdown<br>(N=4132) | Time difference tests |             |
|------------------------------------|--------------------------|---------------------------|---------------------------|-----------------------|-------------|
|                                    | N (%)                    | N (%)                     | N (%)                     | X <sup>2</sup>        | p           |
| Age Category                       |                          |                           |                           | <b>18.285</b>         | <b>.006</b> |
| <25                                | 886 (20.0) <sup>a</sup>  | 216 (16.7) <sup>b</sup>   | 883 (21.4) <sup>a</sup>   |                       |             |
| 25-44                              | 1737 (39.3) <sup>a</sup> | 516 (40.0) <sup>a</sup>   | 1550 (37.5) <sup>a</sup>  |                       |             |
| 45-64                              | 1135 (25.6) <sup>a</sup> | 347 (26.9) <sup>a</sup>   | 1115 (27.0) <sup>a</sup>  |                       |             |
| ≥65                                | 667 (15.1) <sup>a</sup>  | 212 (16.4) <sup>a</sup>   | 584 (14.1) <sup>a</sup>   |                       |             |
| Sex                                |                          |                           |                           | 1.788                 | .409        |
| Female                             | 2003 (45.4) <sup>a</sup> | 558 (43.3) <sup>a</sup>   | 1850 (44.8) <sup>a</sup>  |                       |             |
| Male                               | 2413 (54.6) <sup>a</sup> | 732 (56.7) <sup>a</sup>   | 2278 (55.2) <sup>a</sup>  |                       |             |
| Has had a Partner                  |                          |                           |                           | <b>10.339</b>         | <b>.006</b> |
| Yes                                | 1484 (33.5) <sup>a</sup> | 417 (32.3) <sup>a,b</sup> | 1252 (30.3) <sup>b</sup>  |                       |             |
| No                                 | 2941 (66.5) <sup>a</sup> | 874 (67.7) <sup>a,b</sup> | 2880 (69.7) <sup>b</sup>  |                       |             |
| Education <sup>t</sup>             |                          |                           |                           | 1.806                 | .405        |
| High school or more                | 2329 (72.3) <sup>a</sup> | 697 (74.0) <sup>a</sup>   | 2285 (73.6) <sup>a</sup>  |                       |             |
| Less than high school              | 893 (27.7) <sup>a</sup>  | 245 (26.0) <sup>a</sup>   | 821 (26.4) <sup>a</sup>   |                       |             |
| Income security                    |                          |                           |                           | 4.784                 | .091        |
| Has some income                    | 3458 (78.1) <sup>a</sup> | 1045 (80.9) <sup>a</sup>  | 3243 (78.5) <sup>a</sup>  |                       |             |
| No income except Social Assistance | 967 (21.9) <sup>a</sup>  | 246 (19.1) <sup>a</sup>   | 889 (21.5) <sup>a</sup>   |                       |             |
| LOS category                       |                          |                           |                           | <b>14.490</b>         | <b>.025</b> |
| 7 days or less                     | 730 (16.5) <sup>a</sup>  | 237 (18.4) <sup>a</sup>   | 710 (17.2) <sup>a</sup>   |                       |             |
| 8 to 30 days                       | 2055 (46.4) <sup>a</sup> | 598 (46.3) <sup>a,b</sup> | 2040 (49.4) <sup>b</sup>  |                       |             |
| 30 days to 90 days                 | 1033 (23.3) <sup>a</sup> | 285 (22.1) <sup>a,b</sup> | 867 (21.0) <sup>b</sup>   |                       |             |
| > 90 days                          | 607 (13.7) <sup>a</sup>  | 171 (13.2) <sup>a</sup>   | 515 (12.5) <sup>a</sup>   |                       |             |

Note: Column proportions in a row not sharing superscripts are significantly different from one another. <sup>t</sup>26% of patients had unknown education status

**Table 2***Changes in Admission Status and Diagnoses during Pre-pandemic, Lockdown and Post-lockdown*

|                              | Pre-pandemic<br>(N=4425) | Lockdown<br>(N=1291)      | Post-lockdown<br>(N=4132)  | Time difference tests |                 |
|------------------------------|--------------------------|---------------------------|----------------------------|-----------------------|-----------------|
|                              | N (%)                    | N (%)                     | N (%)                      | X <sup>2</sup>        | p               |
| <b>Inpatient Status</b>      |                          |                           |                            | <b>48.155</b>         | <b>&lt;.001</b> |
| Involuntary                  | 2164 (48.9) <sup>a</sup> | 745 (57.7) <sup>b</sup>   | 2277 (55.1) <sup>b</sup>   |                       |                 |
| Voluntary                    | 2261 (51.1) <sup>a</sup> | 546 (42.3) <sup>b</sup>   | 1855 (44.9) <sup>b</sup>   |                       |                 |
| <b>Diagnosis<sup>t</sup></b> |                          |                           |                            | <b>58.667</b>         | <b>&lt;.001</b> |
| Psychotic D/O                | 1381 (31.2) <sup>a</sup> | 502 (38.9) <sup>b</sup>   | 1454 (35.2) <sup>c</sup>   |                       |                 |
| Substance Use D/O            | 984 (22.2) <sup>a</sup>  | 265 (20.6) <sup>a,b</sup> | 812 (19.7) <sup>b</sup>    |                       |                 |
| Mood and Anxiety D/O         | 1545 (34.9) <sup>a</sup> | 396 (30.7) <sup>b</sup>   | 1415 (34.2) <sup>a,b</sup> |                       |                 |
| Neurocognitive D/O           | 298 (6.7) <sup>a</sup>   | 62 (4.8) <sup>b</sup>     | 212 (5.1) <sup>b</sup>     |                       |                 |
| Personality D/O              | 93 (2.1) <sup>a</sup>    | 37 (2.9) <sup>a,b</sup>   | 126 (3.0) <sup>b</sup>     |                       |                 |
| Neurodevelopmental D/O       | 78 (1.8) <sup>a</sup>    | 13 (1.0) <sup>a</sup>     | 78 (1.9) <sup>a</sup>      |                       |                 |
| Other                        | 46 (1.0) <sup>a</sup>    | 14 (1.1) <sup>a</sup>     | 35 (0.8) <sup>a</sup>      |                       |                 |

Note: Column proportions in a row not sharing superscripts are significantly different from one another.

<sup>t</sup>2 patients did not have psychiatric diagnosis.

**Table 3***Changes in Clinical Presentation during Pre-pandemic, Lockdown and Post-lockdown*

|                             | Pre-pandemic<br>(N=4425) | Lockdown<br>(N=1291)     | Post-<br>lockdown<br>(N=4132) | Time difference tests |                 |
|-----------------------------|--------------------------|--------------------------|-------------------------------|-----------------------|-----------------|
|                             |                          |                          |                               | F (2, 9203)           | P               |
| Clinical Rating Scales      |                          |                          |                               |                       |                 |
| Violence Sum                | 2.26 (3.70) <sup>a</sup> | 2.68 (3.84) <sup>b</sup> | 2.39 (3.82) <sup>a</sup>      | <b>6.517</b>          | <b>.001</b>     |
| Aggressive Behaviour Scale  | 1.62 (2.80) <sup>a</sup> | 1.78 (2.88) <sup>a</sup> | 1.72 (2.87) <sup>a</sup>      | 2.252                 | .105            |
| Depression Severity Index   | 3.15 (3.52) <sup>a</sup> | 2.75 (3.35) <sup>b</sup> | 2.90 (3.50) <sup>b</sup>      | <b>9.185</b>          | <b>&lt;.001</b> |
| Positive Symptom Scale      | 3.52 (4.56) <sup>a</sup> | 4.42 (5.21) <sup>b</sup> | 3.74 (4.62) <sup>a</sup>      | <b>18.261</b>         | <b>&lt;.001</b> |
| Social Withdrawal Scale     | 4.80 (5.08) <sup>a</sup> | 3.98 (4.69) <sup>b</sup> | 4.17 (4.87) <sup>b</sup>      | <b>23.900</b>         | <b>&lt;.001</b> |
| Cognitive Performance Scale | 0.71 (1.29) <sup>a</sup> | 0.72 (1.21) <sup>a</sup> | 0.73 (1.24) <sup>a</sup>      | 0.496                 | .609            |

Note: Means in a row not sharing superscripts are significantly different from one another.

**Figure 1**

*Daily Hospital Admissions (Seven Day Mean)*

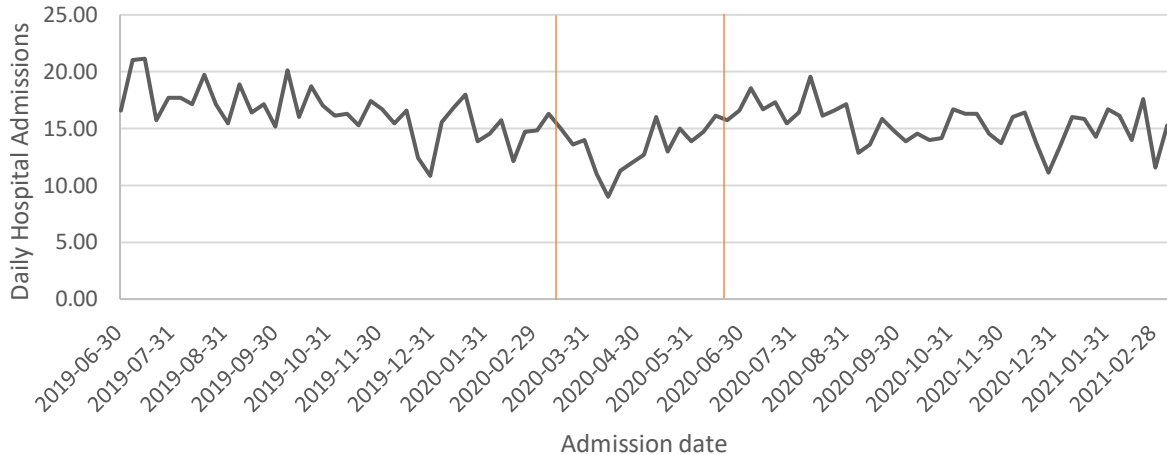

*Note:* Vertical lines indicate start and end of lockdown period.

Confidential



**Figure 2**

*Clinical Indicators for Social Withdrawal, Cognitive Performance and Depression per Time Period*

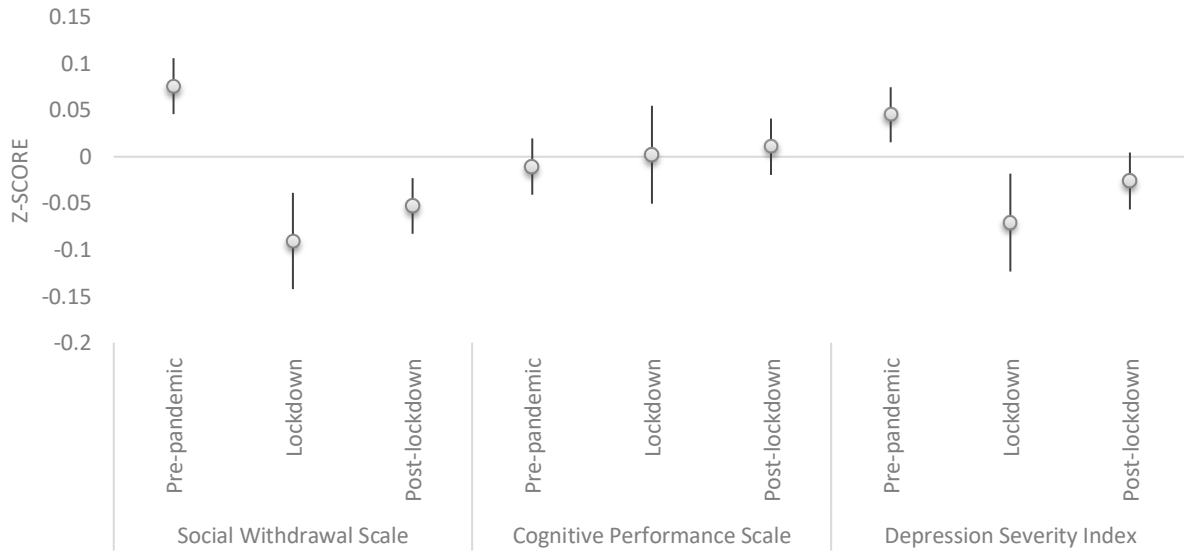

*Note:* Error bars show 95% confidence intervals.

**Figure 3**

*Clinical Indicators for Violence, Aggression and Positive Symptoms per Time Period*

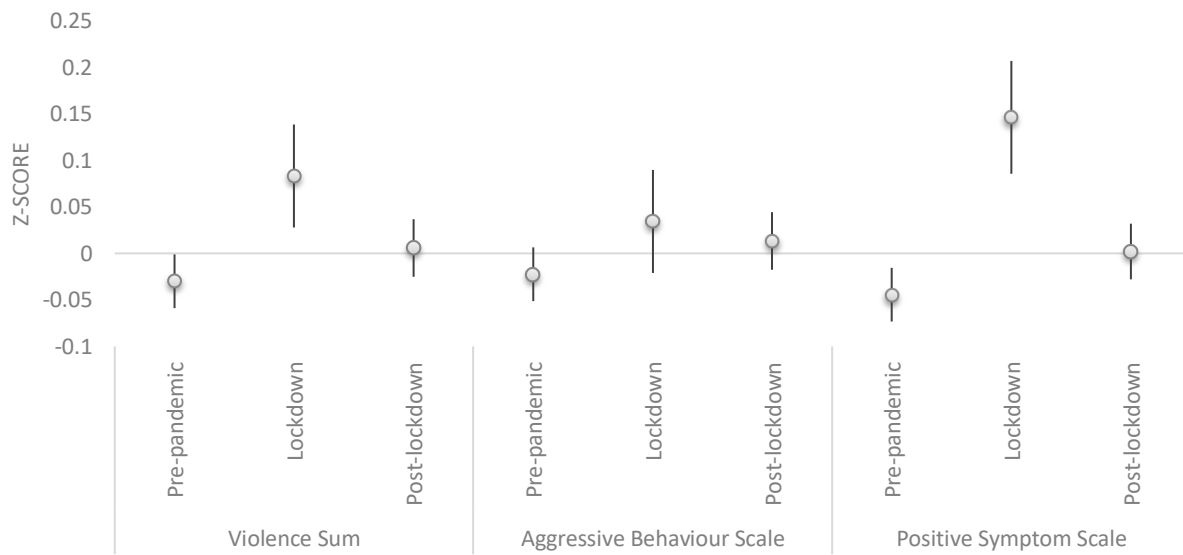

*Note:* Error bars show 95% confidence intervals.
